# Supplementary material for: Enhanced photoelectrochemical water oxidation via atomic layer deposition of TiO2 on fluorine-doped tin oxide nanoparticle films
Source: Royal Society of Chemistry journal article supplement (doi:10.1039/c4nr07377k), 2015-01-01
Supplement: c4nr07377k1.pdf [file c4nr07377k1.pdf]

**Supporting Information**  
*of*  
**Enhanced Photoelectrochemical Water Oxidation via Atomic Layer Deposition of TiO<sub>2</sub>  
on Fluorine-Doped Tin Oxide Nanoparticle Films**

*Isvar A. Cordova\**, *Qing Peng,\** *Isa L. Ferrall*, *Adam J. Rieth*, *Paul G. Hoertz*, *Jeffrey T. Glass\**

Email: [isvar.cordova@duke.edu](mailto:isvar.cordova@duke.edu); [qing.peng@duke.edu](mailto:qing.peng@duke.edu); [jtglass@duke.edu](mailto:jtglass@duke.edu)

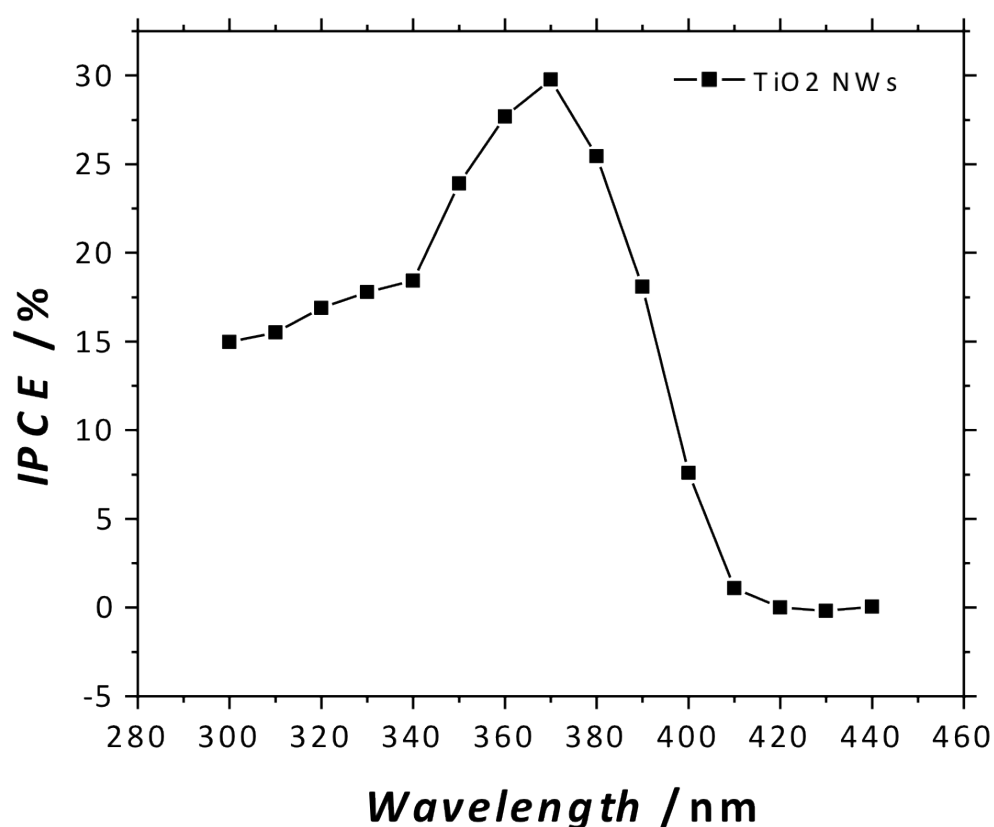

**Figure S1.** IPCE spectrum of 1.8  $\mu\text{m}$  rutile TiO<sub>2</sub> NW on FTO glass.

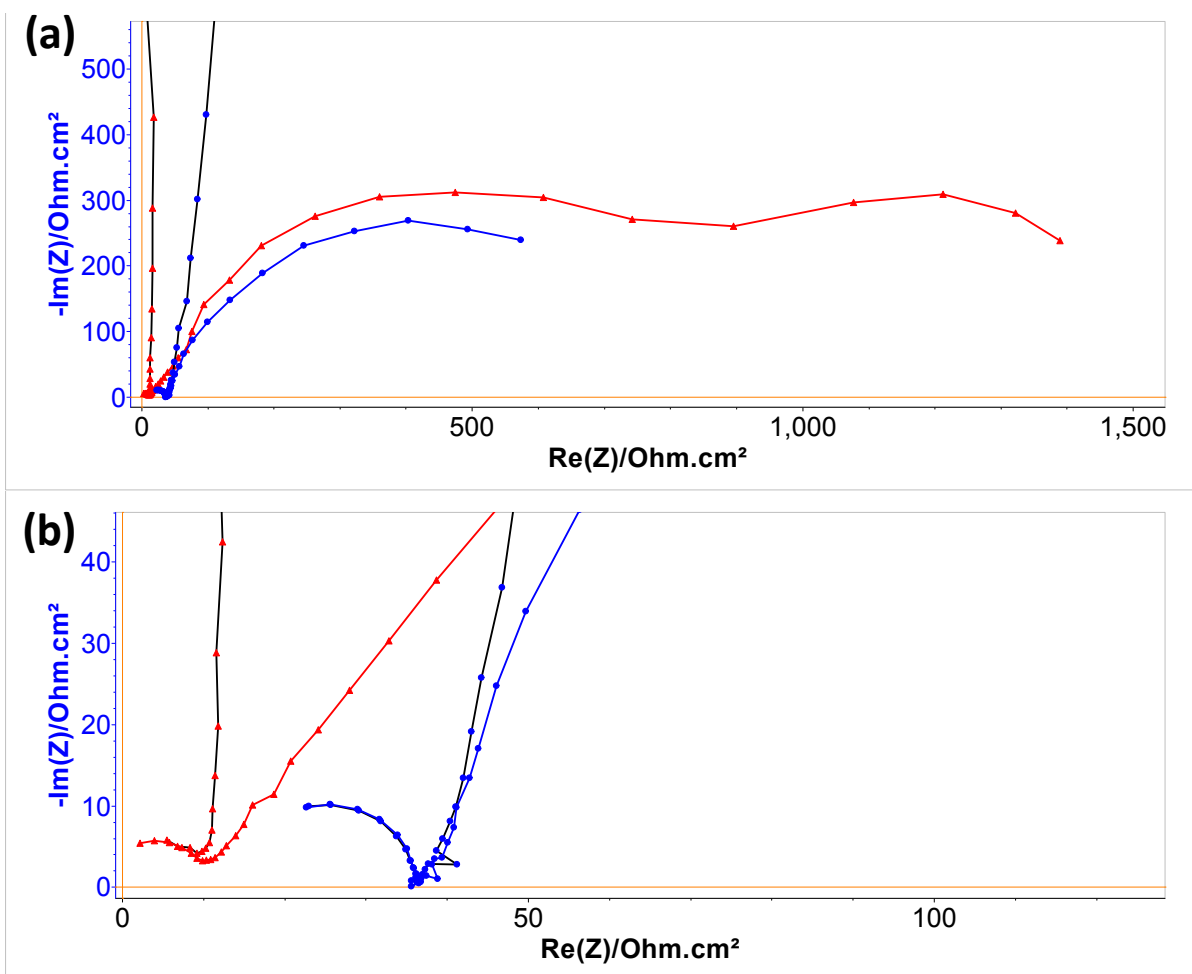

**Figure S2.** EIS Spectra collected at  $E_{\text{Ag/AgCl}} = 0$  V displayed across a) full frequency range and b) in higher frequency range for both  $\text{TiO}_2$  NWs (red markers) and  $\text{TiO}_2(10\text{nm})/\text{nanoFTO}$  (blue markers) in dark (black lines) and under illumination (colored lines).

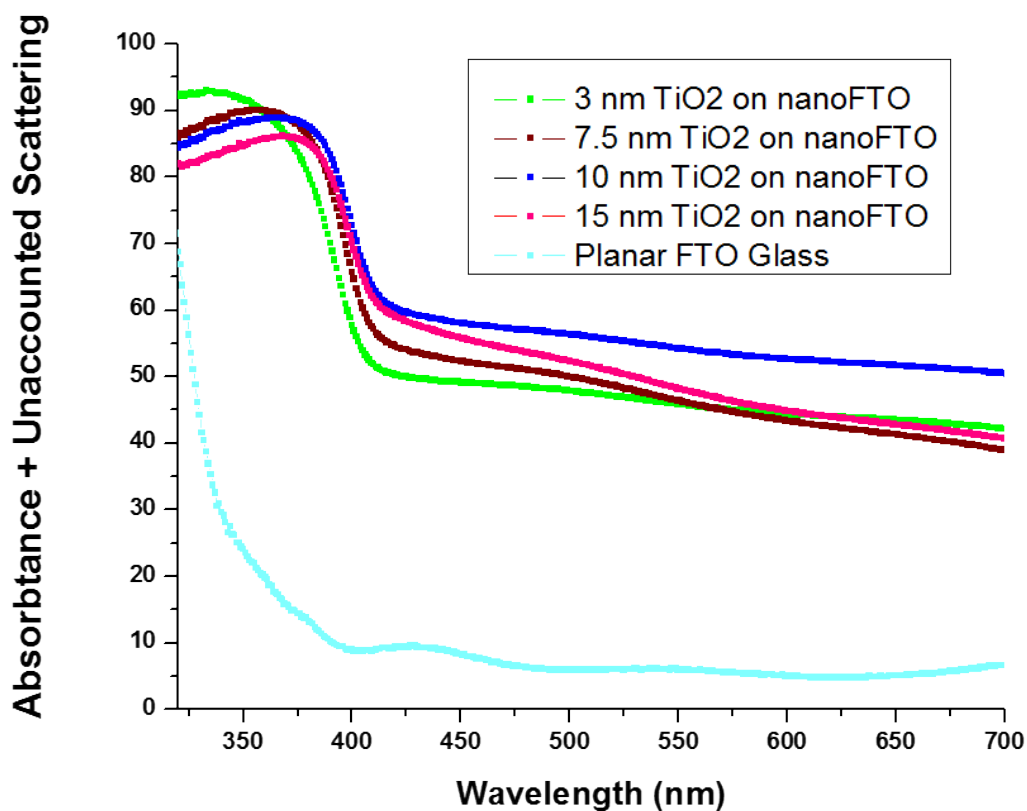

**Figure S3.** UV-Vis spectra from TiO<sub>2</sub>/nanoFTO samples tested with the underlying planar FTO glass substrate as a blank for reference. Since neither FTO nor TiO<sub>2</sub> is expected to absorb in the wavelength regime above 415 nm, these higher values are expected to due to strong scattering effects from the nanoFTO scaffold.

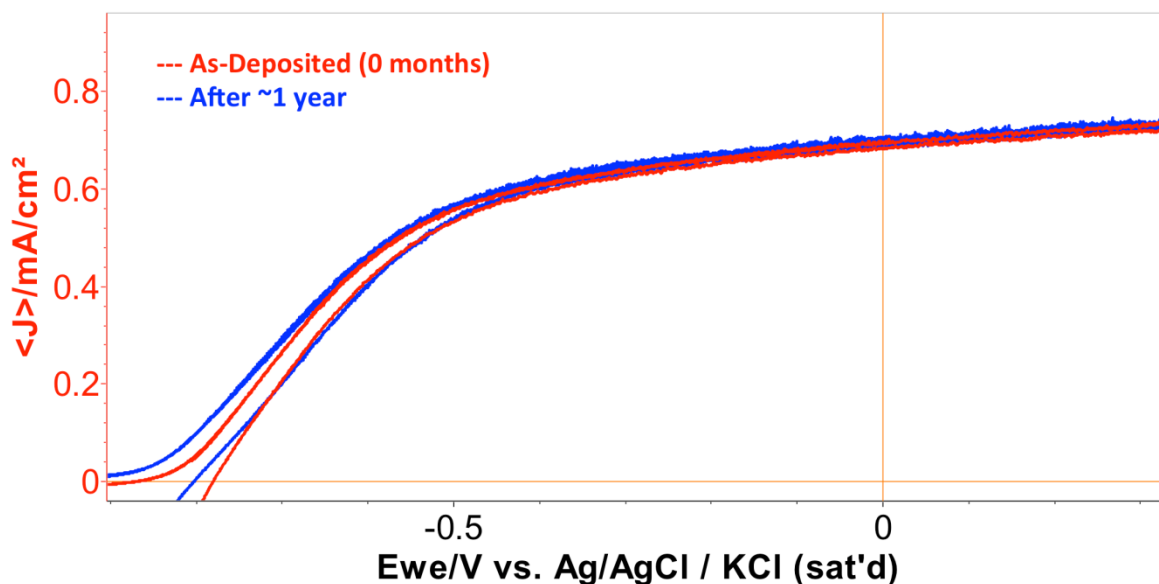

**Figure S4.** Cyclic voltammograms of a TiO<sub>2</sub>(10nm)/nanoFTO sample shortly after being deposited with TiO<sub>2</sub> (red curve) and after 1 year of intermittent testing (blue curve).
